# Supplementary material for: Knowledge and use of medicinal plants by local specialists in an region of Atlantic Forest in the state of Pernambuco (Northeastern Brazil)
Source: Springer Nature journal article supplement (doi:10.1186/1746-4269-1-9), 2005-11-01

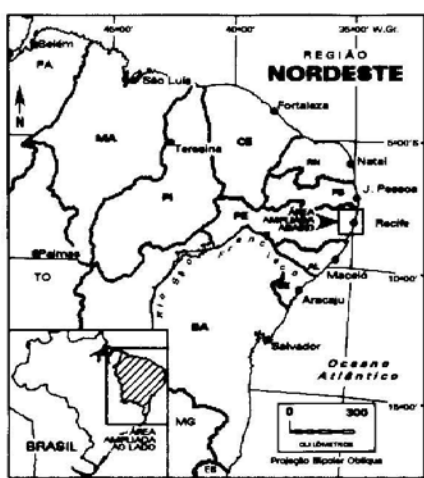

**REGIÃO METROPOLITANA DO RECIFE**  
**MUNICÍPIO DE IGARASSU**

**CONVENÇÕES CARTOGRÁFICAS**

- VIA PAVIMENTADA
- - - CURSO D'ÁGUA
- · - · - · LIMITE INTERMUNICIPAL
- NÚCLEO URBANO - SEDE DE MUNICÍPIO

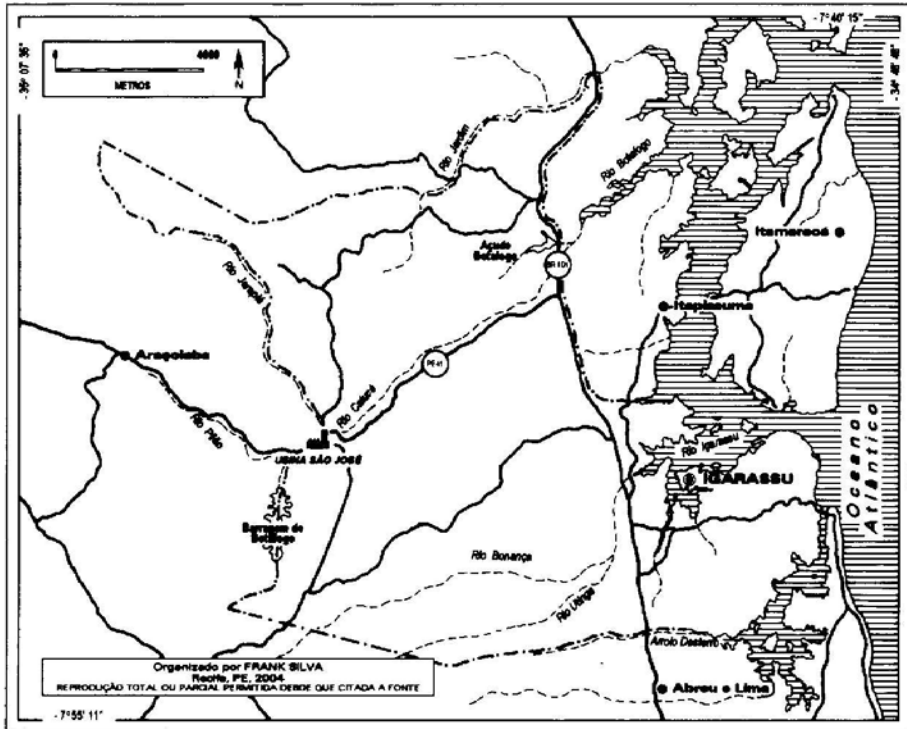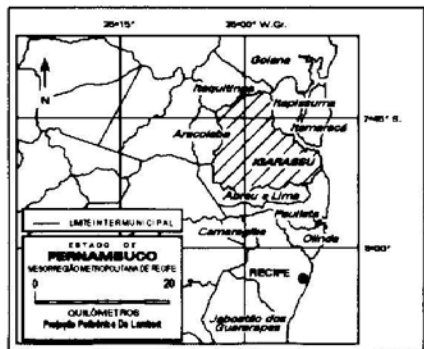

Supplement: 13002_2005_9_MOESM2_ESM.pdf [file 13002_2005_9_MOESM2_ESM.pdf]
